# Supplementary material for: Does Music Intervention Improve Anxiety in Dementia Patients? A Systematic Review and Meta-Analysis of Randomized Controlled Trials
Source: MDPI journal article supplement (doi:10.3390/jcm12175497), 2023-08-24
Supplement: s1 [file s1]

List of excluded articles

| No | First Author / Publication Year | Title                                                                                                                                                                                                        | Journal/Book                                                   | Exclusion   |
|----|---------------------------------|--------------------------------------------------------------------------------------------------------------------------------------------------------------------------------------------------------------|----------------------------------------------------------------|-------------|
| 1  | Alonso 2019                     | Treatment and control of behavioral and psychological symptoms                                                                                                                                               | Recent Advances in Alzheimer Research                          | Not RCT     |
| 2  | Creese et al., 2019             | The development and use of the assessment of dementia awareness and person-centred care training tool in long-term care                                                                                      | Dementia                                                       | Not RCT     |
| 3  | Curran., Loi S. 2012            | Depression and dementia                                                                                                                                                                                      | Medical Journal of Australia                                   | Not RCT     |
| 4  | Svansdottir et al., 2006        | Music therapy in moderate and severe dementia of Alzheimer's type: a case-control study                                                                                                                      | International Psychogeriatrics                                 | Not RCT     |
| 5  | Valdiglesias et al., 2017       | Is Salivary Chromogranin A a Valid Psychological Stress Biomarker During Sensory Stimulation in People with Advanced Dementia?                                                                               | Journal of Alzheimer's Disease                                 | Not RCT     |
| 6  | Davison et al., 2016            | A personalized multimedia device to treat agitated behavior and improve mood in people with dementia: A pilot study                                                                                          | Geriatric Nursing                                              | Pilot study |
| 7  | Hutson et al., 2014             | Sonas: a pilot study investigating the effectiveness of an intervention for people with moderate to severe dementia                                                                                          | Am Journal of Alzheimer's Disease<br>Other Demen               | Pilot study |
| 8  | Thornley et al., 2016           | Music therapy in patients with dementia and behavioral disturbance on an inpatient psychiatry unit: results from a pilot randomized controlled study                                                         | International Psychogeriatrics                                 | Pilot study |
| 9  | Lai et al., 2016                | Interdisciplinary collaboration in the use of a music-with-movement intervention to promote the wellbeing of people with dementia and their families: Development of an evidence-based intervention protocol | Nursing & Health Sciences                                      | Protocol    |
| 10 | Loi et al., 2022                | Music and Psychology & Social Connections Program: Protocol for a Novel Intervention for Dyads Affected by Younger-Onset Dementia                                                                            | Brain Sciences                                                 | Protocol    |
| 11 | Mahendran et al., 2017          | Art therapy and music reminiscence activity in the prevention of cognitive decline: Study protocol for a randomized controlled trial                                                                         | Trials                                                         | Protocol    |
| 12 | Tan et al., 2018                | Study protocol for a randomized controlled trial of choral singing intervention to prevent cognitive decline in at-risk older adults living in the community                                                 | Frontiers in Aging Neuroscience                                | Protocol    |
| 13 | Tang et al., 2013               | The effectiveness of nursing management on improving health outcomes for hospitalized older adults with delirium: A systematic review protocol                                                               | JB I Database of Systematic Reviews and Implementation Reports | Protocol    |
| 14 | Gaviola et al., 2020            | Impact of individualised music listening intervention on persons with dementia: A systematic review of randomised controlled trials                                                                          | Australasian journal on ageing                                 | Review      |
| 15 | Na et al., 2019                 | A systematic review and meta-analysis of nonpharmacological interventions for moderate to severe dementia                                                                                                    | Psychiatry Investigation                                       | Review      |
| 16 | Noone et al., 2019              | Meta-analysis of psychosocial interventions for people with dementia and anxiety or depression                                                                                                               | Aging & mental health                                          | Review      |
| 17 | Scott S. et al., 2016           | A scoping review of music and anxiety, depression and agitation in older people with dementia in residential facilities and specialist care units                                                            | European Geriatric Medicine                                    | Review      |
| 18 | Bakerjian et al., 2020          | The Impact of Music and Memory on Resident Level Outcomes in California Nursing Homes                                                                                                                        | Journal of the American Medical Directors Association          | Unrelated   |
| 19 | Buard et al., 2021              | Randomized controlled trial of neurologic music therapy in Parkinson’s disease: research rehabilitation protocols for mechanistic and clinical investigations                                                | Trials                                                         | Unrelated   |
| 20 | Dell’Olio et al., 2020          | Preoperative receptive music therapy in oral oncologic surgery: Preliminary study                                                                                                                            | Dental Cadmos                                                  | Unrelated   |
| 21 | Giaquinto et al., 2006          | Effects of music-based therapy on distress following knee arthroplasty                                                                                                                                       | British Journal of Nursing                                     | Unrelated   |
| 22 | Kwak et al., 2020               | Findings From a Prospective Randomized Controlled Trial of an Individualized Music Listening Program for Persons With Dementia                                                                               | Journal of Applied Gerontology                                 | Unrelated   |
| 23 | McCreedy et al., 2022           | Pragmatic Trial of Personalized Music for Agitation and Antipsychotic Use in Nursing Home Residents With Dementia                                                                                            | Journal of the American Medical Directors Association          | Unrelated   |
| 24 | Pérez-Ros et al., 2019          | Preoperative receptive music therapy in oral oncologic surgery: Preliminary study                                                                                                                            | Journal of Alzheimer's Disease                                 | Unrelated   |
| 25 | Raglio et al., 2015             | Effect of Active Music Therapy and Individualized Listening to Music on Dementia: A Multicenter Randomized Controlled Trial                                                                                  | Journal of the American Geriatrics Society                     | Unrelated   |
| 26 | Yeh et al., 2019                | Online Simulation-Based Mastery Learning with Deliberate Practice: developing Interprofessional Communication Skill                                                                                          | Clinical simulation in nursing                                 | Unrelated   |
| 27 | Young et al., 2019              | Effects of Physical Activity Intervention for Chinese People With Severe Mental Illness                                                                                                                      | Research on social work practice                               | Unrelated   |
