# Supplementary material for: Does Music Intervention Improve Anxiety in Dementia Patients? A Systematic Review and Meta-Analysis of Randomized Controlled Trials
Source: MDPI journal article supplement (doi:10.3390/jcm12175497), 2023-08-24
Supplement: s1 [file s1]

|                           | Random sequence generation (selection bias) | Allocation concealment (selection bias) | Blinding of participants and personnel (performance bias) | Blinding of outcome assessment (detection bias) | Incomplete outcome data (attrition bias) | Selective reporting (reporting bias) | Other bias |
|---------------------------|---------------------------------------------|-----------------------------------------|-----------------------------------------------------------|-------------------------------------------------|------------------------------------------|--------------------------------------|------------|
| Cheung et al., 2018       | +                                           | +                                       | +                                                         | +                                               | +                                        | +                                    | +          |
| Cheung et al., 2022       | +                                           | +                                       | +                                                         | +                                               | +                                        | +                                    | +          |
| Cooke et al. 2010         | +                                           | +                                       | +                                                         | +                                               | +                                        | +                                    | +          |
| Delphin-Combe et al. 2013 | +                                           | +                                       | +                                                         | +                                               | +                                        | +                                    | +          |
| Dimitriou et al., 2020    | +                                           | +                                       | +                                                         | ?                                               | +                                        | +                                    | ?          |
| Giovagnoli et al., 2017   | +                                           | +                                       | +                                                         | ?                                               | +                                        | +                                    | +          |
| Guétin et al. 2009        | +                                           | +                                       | ?                                                         | ?                                               | +                                        | +                                    | +          |
| Liu et al. 2021           | +                                           | +                                       | +                                                         | +                                               | +                                        | ?                                    | +          |
| Pongan et al., 2017       | +                                           | +                                       | +                                                         | +                                               | +                                        | +                                    | +          |
| Raglio et al., 2008       | +                                           | +                                       | +                                                         | +                                               | +                                        | +                                    | +          |
| Sánchez et al., 2016      | +                                           | ?                                       | ?                                                         | ?                                               | +                                        | +                                    | +          |
| Sung et al. 2010          | ?                                           | ?                                       | +                                                         | +                                               | +                                        | +                                    | +          |
| Sung et al. 2012          | +                                           | +                                       | +                                                         | +                                               | +                                        | +                                    | +          |

**Figure S1a.** Risk of bias summary: review authors' judgements about each risk of bias item for each included study.

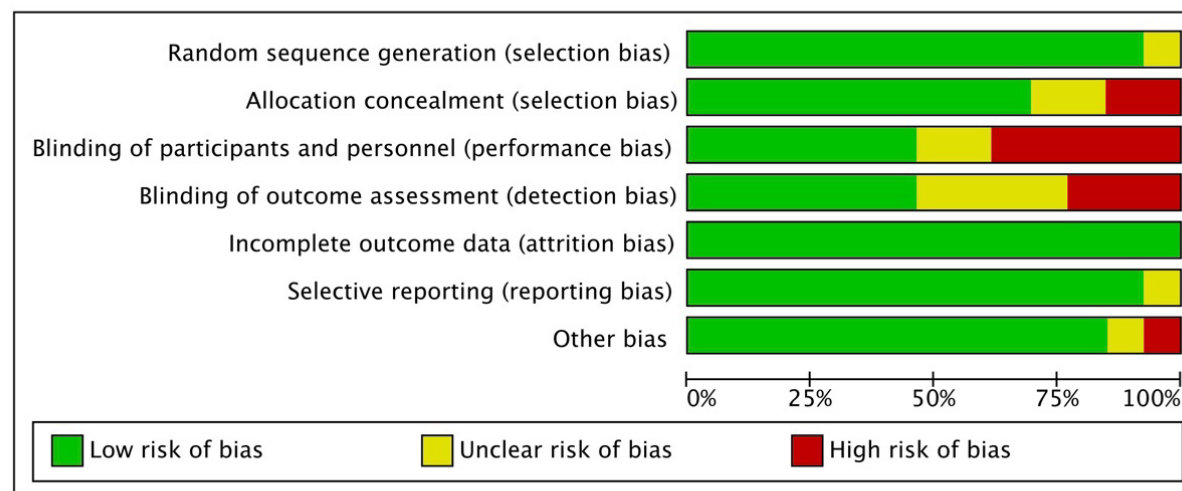

**Figure S1b.** Percentage of the risk of bias for each study.
